# Supplementary material
Source: PubMed Central journal article supplement (PMC9590256)
Supplement: NIHMS1842838-supplement-SFig__1.pdf [file NIHMS1842838-supplement-SFig__1.pdf]

|               | FR1                                     | CDR1                        | FR2                                                            | CDR2                                                 | FR3 |
|---------------|-----------------------------------------|-----------------------------|----------------------------------------------------------------|------------------------------------------------------|-----|
| C. milii HHC2 | DL-VLKQPPYL                             | TGKTGQALRLTCESSGFNLSIAHMS-- | WYRQLPGKQ                                                      | QENLLKYE-GSSIKSFGTGFENRVIVIREDSQNIFDLIIKCPTVHDTSTYYC |     |
| HHC1          | SG-S.T...T.....S.....RT...DHDSYYYCMY.   |                             | .R.K.                                                          | TSD-YR.SN..ES.VG...T.V..N.N.....S.R.E..A....         |     |
| H. colliei μ  | GAV..T..AT....P.T.V....RT.....GNYP.H--  |                             | .V..V...GL.W..H.Y-T..SNGYAP.I.S..T..K...N.....S.....AI...      |                                                      |     |
| HCAb          | AAA..T..ES....A..S.....RA..L.IGRYT.F--  |                             | .RDQ.                                                          | WHD-S..S.R.AA.I....T.....N.....SLR.E..A..S.          |     |
| H. francisci  | .V--T..EAE...P.GS.....KT.....GNTR.Y--   |                             | .I..V...QGL.W.VH.D-A..SN.YAPEIKD.FTASKDT.N...A.AM.NLKTEG.AI... |                                                      |     |
| I. punctatus  | QS--.TSSVS.VKRP.ESVT.S.TV...SM..CN.N--  |                             | .N..K..RGL.WIGYID-.GTSTT.AQSLQGQFSITKDTDK.MLY.EV.NLCAA..AV...  |                                                      |     |
| X. laevis     | QT--.QESGPG.V.PSES.....TV...E.TSS..H--  |                             | .I..P...GL.WIGYVR-T.GGTA.ADSLK...TITKDNGKKQVY.QMNGME.K..AM...  |                                                      |     |
| C. mydas      | QV-Q.VESGGDVK.P.DS...S.KA...TF.SYW.Q--  |                             | .V..A...GL.WIGEIHPT.TTINYAQP.KG.FTIS.DNPN.LLY.QMTGLKSE..AR...  |                                                      |     |
| G. gallus     | AV-T.DESGGGLQTP.G..S.V.KA...DF.SYD.L--  |                             | .V..A...GL.WVAGIDDDG.YTAYAPAVKG.ATIS.DNG.STVR.QLNNLRAE..A....  |                                                      |     |
| H. sapiens    | QV-Q.VESGGGSV.P.GS...S.TA...TF.DY...--  |                             | .I..A...GL.WVAYISGRG..IKYADSVKG.FTIS.DNAK.S...QMDTLRAD..AI...  |                                                      |     |
| M. musculus   | EV-K.VESEGLVQP.SSMK.S.TA...TF.DYY.A--   |                             | .V..V.E.GL.WVANINYDG.STYYLDSLKG.F.IS.DNAK..LY.QMSSLKSE..A....  |                                                      |     |
| O. cuniculus  | QE-Q..ESGGGLVQP.GS.K.S.KA...D..SYY...-- |                             | .I..A...GL.WIGIIYA...STDYASWVNG.FTISSDNA..TV..QMNNL.AA..A..F.  |                                                      |     |
| L. glama VH   | .QESGGGLVQP.GS.K.S.AA...TF.SYA...--     |                             | .V..A...GL.WVSDINSAGGST.YADSVKG.FTIS.DNAK.TLY.QMNNLKPE..AV...  |                                                      |     |
| L. glama VHH3 | .QESGGGLVQP.ES...S.AA...TFDDYAIV--      |                             | .F..A...ER.GVSCISTNGDYTTYADSVKD.FTIS.DNAK.TVY.QMSSLKPE..AV...  |                                                      |     |
| L. glama VHH1 | .QESGGGLVQP.GS.T.S.SA..LSF.NYA.G--      |                             | .F..G...ER.FVAAISRSGGGIYYADSVLG.STIS.DNAKHTVY.QMNSLKPD..AV...  |                                                      |     |
| IgNAR         | AR-.DQT.RSV.KE.GES.TIN.VLRDASYALGSTC--  |                             | .K.KSG-----                                                    | .TNEESISKGG.YVETVNSGSKS.S.R.NDL..E.GG..R.            |     |

SFigure 1
